# Supplementary material for: The de novo assembly and characterization of the complete mitochondrial genome of bottle gourd (Lagenaria siceraria) reveals the presence of homologous conformations produced by repeat-mediated recombination
Source: Front Plant Sci. 2024 Aug 12;15:1416913. doi: 10.3389/fpls.2024.1416913 (PMC11345175; doi:10.3389/fpls.2024.1416913)
Supplement: Supplementary file 5 [file Table1.xlsx]

## Sheet: Sheet1
Table S1. Oxford Nanopore and Illumina sequencing Summary.
Oxford Nanopore sequencing Summary
Counts of raw reads	Total number of bases in raw data	Counts of clean reads	Total number of bases in clean data	N50 read length of clean data	N90 read length of clean data	Average read length of clean data	Maximum read length of clean data	Average read quality score of clean data
609303	7.23Gb	587011	7.14Gb	20153bp	6687bp	12157bp	106230bp	10
Illumina sequencing Summary
Raw Reads	Clean Reads	Raw Base(Gb)	Clean Base(Gb)	Effective(%)	Error(%)	Q20(%)	Q30(%)	GC(%)
44212316	44040580	6.63	6.61	99.61	0.03	95.89	89.58	34.96
LncRNA sequencing Summary
Raw Reads	Clean Reads	Raw Base(Gb)	Clean Base(Gb)	Effective(%)	Error(%)	Q20(%)	Q30(%)	GC(%)
101635922	90273466	15.25	13.54	88.82	0.03	96.92	92.41	41.42
