# Supplementary material for: The de novo assembly and characterization of the complete mitochondrial genome of bottle gourd (Lagenaria siceraria) reveals the presence of homologous conformations produced by repeat-mediated recombination
Source: Front Plant Sci. 2024 Aug 12;15:1416913. doi: 10.3389/fpls.2024.1416913 (PMC11345175; doi:10.3389/fpls.2024.1416913)
Supplement: Supplementary file 6 [file Table2.xlsx]

## Sheet: Sheet1
Table S2.The relative synonymous codon use of codons by individual amino acids in the mitochondrial genome of Lagenaria siceraria.
Ala	GCU	GCA	GCC	GCG
	1.59	0.98	0.93	0.51
Arg	AGA	CGA	CGU	CGG	AGG	CGC
	1.44	1.32	1.24	0.7	0.69	0.61
Asn	AAU	AAC
	1.35	0.65
Asp	GAU	GAC
	1.37	0.63
Cys	UGU	UGC
	1.21	0.79
End	UAA	UGA	UAG
	1.63	0.86	0.51
Gln	CAA	CAG
	1.51	0.49
Glu	GAA	GAG
	1.35	0.65
Gly	GGA	GGU	GGG	GGC
	1.45	1.32	0.71	0.52
His	CAU	CAC
	1.51	0.49
Ile	AUU	AUC	AUA
	1.32	0.88	0.8
Leu	UUA	CUU	UUG	CUA	CUC	CUG
	1.4	1.24	1.21	0.93	0.65	0.57
Lys	AAA	AAG
	1.23	0.77
Met	AUG
	1
Phe	UUU	UUC
	1.11	0.89
Pro	CCU	CCA	CCC	CCG
	1.45	1.09	0.83	0.63
Ser	UCU	UCA	AGU	UCC	UCG	AGC
	1.29	1.17	1.05	1	0.89	0.61
Thr	ACU	ACC	ACA	ACG
	1.34	1.02	1.01	0.63
Trp	UGG
	1
Tyr	UAU	UAC
	1.52	0.48
Val	GUU	GUA	GUG	GUC
	1.2	1.14	0.87	0.79
