# Supplementary material for: The de novo assembly and characterization of the complete mitochondrial genome of bottle gourd (Lagenaria siceraria) reveals the presence of homologous conformations produced by repeat-mediated recombination
Source: Front Plant Sci. 2024 Aug 12;15:1416913. doi: 10.3389/fpls.2024.1416913 (PMC11345175; doi:10.3389/fpls.2024.1416913)
Supplement: Supplementary file 7 [file Table3.xlsx]

## Sheet: Sheet1
Table S3. The homologous DNA fragment in the Lagenaria siceraria mitochondrial genome.
Number	Mitochondrial genome	% Identity	Alignment Length	Mismatches	Gap Openings	Alignment start (chloroplast genome)	Alignment end (chloroplast genome)	Alignment start (mitochondrial genome)	Alignment end (mitochondrial genome)	E-value	Bit Score	MTPT annotation
MTPT1	mtDNA	100	922	0	0	34430	35351	186040	186961	0	1703	partial psbD exon1
MTPT2	mtDNA	100	102	0	0	106263	106364	106	5	5.14e-47	189	partial trnA-UGC
	mtDNA	100	102	0	0	137575	137676	5	106	5.14e-47	189	partial trnA-UGC
MTPT3	mtDNA	100	100	0	0	35767	35866	195618	195519	6.65e-46	185	partial psbD exon1;partial psbC exon1
MTPT4	mtDNA	100	48	0	0	102966	103013	232367	232320	5.36e-17	89.8	partial trnV-GAC
	mtDNA	100	48	0	0	140926	140973	232320	232367	5.36e-17	89.8	partial trnV-GAC
MTPT5	mtDNA	99.52	417	2	0	26256	26672	200205	200621	0	760	partial rpoB exon1
MTPT6	mtDNA	99.375	2240	8	2	123428	125661	288843	286604	0	4054	complete ndhA exon1;partial ndhH exon1
MTPT7	mtDNA	99.356	3104	17	2	68213	71314	352295	355397	0	5618	partial petL exon1;complete petG exon1;complete trnW-CCA;complete trnP-UGG;complete psaJ exon1;complete rpl33 exon1;complete rps18 exon1;complete rpl20 exon1
MTPT8	mtDNA	99.137	1274	5	2	140850	142122	203190	201922	0	2287	complete trnV-GAC;complete ycf15 exon1
	mtDNA	99.137	1274	5	2	101817	103089	201922	203190	0	2287	complete ycf15 exon1;complete trnV-GAC
MTPT9	mtDNA	99.05	2422	12	4	80244	82654	352297	349876	0	4335	complete rpoA exon1;complete rps11 exon1;complete rpl36 exon1;partial rps8 exon1
MTPT10	mtDNA	99.009	1009	1	1	147	1155	285614	286613	0	1799	partial psbA exon1
MTPT11	mtDNA	98.87	708	4	1	142676	143379	273619	272912	0	1260	partial rps12 exon2
	mtDNA	98.87	708	4	1	100560	101263	272912	273619	0	1260	partial rps12 exon2
MTPT12	mtDNA	98.824	340	3	1	25885	26223	199865	200204	4.3e-172	604	partial rpoB exon1
MTPT13	mtDNA	98.652	816	10	1	122433	123247	289641	288826	0	1445	complete ndhA exon2
MTPT14	mtDNA	97.619	126	3	0	142235	142360	201809	201684	2.36e-55	217	IGS(ycf15 exon1-rps12 exon2)
	mtDNA	97.619	126	3	0	101579	101704	201684	201809	2.36e-55	217	IGS(rps12 exon2-ycf15 exon1)
MTPT15	mtDNA	97.561	164	2	2	101438	101599	126662	126499	2.96e-74	279	IGS(rps12 exon2-ycf15 exon1)
	mtDNA	97.561	164	2	2	142340	142501	126499	126662	2.96e-74	279	IGS(ycf15 exon1-rps12 exon2)
MTPT16	mtDNA	97.436	39	1	0	11752	11790	105363	105401	2.51e-10	67.6	partial atpA exon1
MTPT17	mtDNA	97.316	6184	94	29	143500	149639	272866	266711	0	10434	partial rps7 exon1;complete ndhB exon1;complete ndhB exon2;complete trnL-CAA;partial ycf2 exon1
	mtDNA	97.316	6184	94	29	94300	100439	266711	272866	0	10434	partial ycf2 exon1;complete trnL-CAA;complete ndhB exon2;complete ndhB exon1;partial rps7 exon1
MTPT18	mtDNA	96.693	1512	19	5	26905	28411	330321	328836	0	2486	partial rpoB exon1
MTPT19	mtDNA	94.937	79	4	0	54534	54612	55178	55256	1.47e-27	124	complete trnM-CAU
MTPT20	mtDNA	94.737	133	7	0	101691	101823	201935	201803	1.42e-52	207	IGS(rps12 exon2-ycf15 exon1)
	mtDNA	94.737	133	7	0	142116	142248	201803	201935	1.42e-52	207	IGS(ycf15 exon1-rps12 exon2)
MTPT21	mtDNA	94.681	94	3	2	32	124	10051	10143	1.13e-33	145	complete trnH-GUG
MTPT22	mtDNA	94.118	85	4	1	132473	132556	310192	310108	1.14e-28	128	complete trnN-GUU
	mtDNA	94.118	85	4	1	111383	111466	310108	310192	1.14e-28	128	complete trnN-GUU
MTPT23	mtDNA	89.865	148	15	0	44613	44760	158139	157992	1.43e-47	191	partial ycf3 exon3
MTPT24	mtDNA	89.595	173	16	2	68859	69029	285351	285179	6.55e-56	219	complete trnP-UGG
MTPT25	mtDNA	83.929	168	19	8	68615	68777	285579	285415	1.87e-36	154	complete trnW-CCA
MTPT26	mtDNA	81.609	87	4	6	155033	155107	3440	3354	1.17e-08	62.1	complete trnI-CAU
	mtDNA	81.609	87	4	6	88832	88906	3354	3440	1.17e-08	62.1	complete trnI-CAU
MTPT27	mtDNA	77.459	732	93	38	31442	32145	93950	93263	4.75e-102	372	complete trnD-GUC
