# Supplementary material for: The de novo assembly and characterization of the complete mitochondrial genome of bottle gourd (Lagenaria siceraria) reveals the presence of homologous conformations produced by repeat-mediated recombination
Source: Front Plant Sci. 2024 Aug 12;15:1416913. doi: 10.3389/fpls.2024.1416913 (PMC11345175; doi:10.3389/fpls.2024.1416913)
Supplement: Supplementary file 8 [file Table4.xlsx]

## Sheet: Sheet1
Table S4.All primers used in this study.
Primer Name	Primer Sequence
F1	TTTATTGCCCTAGACCC
R1	CATCATTGTCGGAGGA
F2	TCAGCGGTAGAGTGTCG
R2	GGGTCCCACTTGGAGA
HLnad1-aF	TTTCGAGAAAAGGTCC
HLnad1-aR	ATAACCAATACAGGGAAC
HLnad4L-aF	CTAAAGCACGAACCCC
HLnad4L-aR	CGGAAAGTAATAACGAAAA
HLatp6-oF	TGCTTGGCAATCCTT
HLatp6-oR	TCTTTCGTAGTTCTCCCT
HLatp9-oF	TGAGATGCCCAAGATAAA
HLatp9-oR	AAGCCCGCCTCCACTT
HLrps10-oF	ACACGGAAGATTGGATT
HLrps10-oR	CTCACTTTATTGATGGGAC
HLMTPT6-1F	CATAGCACTAAATAGGGAGC
HLMTPT6-1R	GCCAAGCCATAACAGAT
HLMTPT6-2F	ATAAATGACTATCGGAAACG
HLMTPT6-2R	CTCGCATTCTGCTAAGGAA
HLMTPT7-1F	TTTCGCATAGAAGACG
HLMTPT7-1R	CAGCCAAAGTAATAGG
HLMTPT7-2F	TTTGCCTACCTCTATCC
HLMTPT7-2R	AAGTATCCGCCCAAG
HLMTPT8-1F	GAAGAAGCATCGGACAG
HLMTPT8-1R	CGGAGACCCACCAAA
HLMTPT8-2F	AGAATAGTGGCGTTGAG
HLMTPT8-2R	GTGCCTTCCCGAAT
HLMTPT9-1F	CGACAATCTCCCAACC
HLMTPT9-1R	CTCATTATCTAAACAAACCC
HLMTPT9-2F	TTTCGCATAGAAGACG
HLMTPT9-2R	CAGCCAAAGTAATAGG
HLMTPT10-1F	ACAATGACCACCGTAGA
HLMTPT10-1R	GCTCACAACTTCCCTCTA
HLMTPT10-2F	CATAGCACTAAATAGGGAGC
HLMTPT10-2R	GCCAAGCCATAACAGAT
HLMTPT17-1F	ACTACCGACTCCTCCCG
HLMTPT17-1R	GCTTTCGTTGTTGTGGATGTA
HLMTPT17-2F	GCTCTATTTGCCTCTGC
HLMTPT17-2R	CGGAAACCCAAGGAC
HLMTPT18-1F	TCGGACTGAAGTAAGGA
HLMTPT18-1R	TAAACCCAGGTATTGTAG
HLMTPT18-2F	GAATGGGTACACTTGACG
HLMTPT18-2R	CAAACTAATAGGCTGAACAT
