# Supplementary material for: The de novo assembly and characterization of the complete mitochondrial genome of bottle gourd (Lagenaria siceraria) reveals the presence of homologous conformations produced by repeat-mediated recombination
Source: Front Plant Sci. 2024 Aug 12;15:1416913. doi: 10.3389/fpls.2024.1416913 (PMC11345175; doi:10.3389/fpls.2024.1416913)
Supplement: Supplementary file 9 [file Table5.xlsx]

## Sheet: Sheet1
Table S5. Complete mitochondrial genome information for 36 species in 4 orders of angiosperms (Cucurbitales, Rosales, Fagales and Fabales).
Order	Species	GenBank accession number
Cucurbitales	Lagenaria siceraria
	Momordica charantia	OQ603604.1
	Cucumis melo subsp. agrestis	MW854328_30.1
	Cucumis hystrix chromosome 1-3	OK326879_81.1
	Cucurbita pepo	NC_014050.1
	Cucurbita maxima	OL350846.1
	Luffa acutangula	NC_050067.1
	Citrullus lanatus	NC_014043.1
	Herpetospermum pedunculosum	MW497575.1
	Cucumis sativus	NC_016004.1-NC_016006.1
Rosales	Ziziphus mauritiana	NC_068745.1
	Ziziphus jujuba	NC_029809.1
	Prunus mume	NC_065232.1
	Prunus sibirica	NC_065234.1
	Photinia serratifolia	NC_065220.1
	Rubus chingii	NC_065238.1
	Pyrus betulifolia	NC_054332.1
	Eriobotrya japonica	NC_045228.1
	Potentilla micrantha	NC_062588.1
	Cannabis sativa	NC_029855.1
	Malus baccata	NC_065224.1
	Malus x domestica	NC_018554.1
	Sorbus torminalis	NC_052879.1
	Sorbus aucuparia	NC_052880.1
	Morus notabilis	NC_041177.1
	Fragaria iturupensis	NC_062833.1
	Fragaria tibetica	NC_062832.1
	Geum urbanum	NC_065221.1
	Rosa rugosa	NC_065237.1
	Rosa chinensis	NC_065236.1
Fagales	Lithocarpus litseifolius	NC_065018.1
	Fagus sylvatica isolate FASYL_29_1	NC_050960.1
	Quercus acutissima	MZ636519.1
	Juglans mandshurica	MZ900993.1- MZ900994.1
Fabales	Glycine max	NC_020455.1
	Vigna radiata	NC_015121.1
